1 **Disparities in research capacity for tobacco control: an inventory of peer-reviewed**  
2 **publications using the Global Tobacco Surveillance System data**

3  
4 Isabel Garcia de Quevedo<sup>1</sup>, Amulya Marellapudi<sup>2</sup>, Edward Rainey<sup>1</sup>, Evelyn Twentymann<sup>3</sup>

5  
6  
7  
8 <sup>1</sup> Global Tobacco Control Branch, Office on Smoking and Health, U.S. Centers for Disease  
9 Control and Prevention, Atlanta, Georgia; CDC Foundation, Atlanta, Georgia, United States

10  
11 <sup>2</sup> Emory University, Atlanta GA, United States

12  
13 <sup>3</sup> Global Tobacco Control Branch, Office on Smoking and Health, U.S. Centers for Disease  
14 Control and Prevention, Atlanta, Georgia, United States

15  
16  
17 **Corresponding author:**

18 Isabel Garcia de Quevedo  
19 CDC Foundation, Global Tobacco Control Branch, Office on Smoking and Health, National  
20 Center for Chronic Disease Prevention and Health Promotion  
21 Centers for Disease Control and Prevention  
22 Phone: 770.488.6465 Fax: (770) 488-5971  
23 E-mail: [idequevedolanda@cdc.gov](mailto:idequevedolanda@cdc.gov)

24  
25  
26  
27 The findings and conclusions in this report are those of the authors and do not necessarily  
28 represent the official position of the Centers for Disease Control and Prevention.

29  
30  
31  
32  
33  
34  
35  
36  
37  
38  
39  
40

## 41 **Abstract**

42 Peer-reviewed publications using tobacco surveillance data represent a critical step toward  
43 evidence-based tobacco control, but research and publication capacity in countries with fewer  
44 resources may be limited. This paper describes patterns in use of the Global Adult Tobacco  
45 Survey (GATS) and/or Global Youth Tobacco Survey (GYTS) data for publications, investigates  
46 the origin of the data versus the origin of lead authorship, and describes geographic patterns of  
47 publications by country, region, and country income. A bibliometric inventory using six search  
48 engines was conducted for relevant studies using data from either of these surveys between  
49 January 1999 and January 2021. Descriptive statistics, including frequencies and percentages,  
50 were used to analyze publication characteristics. Our search strategy retrieved 1,834 initial  
51 records; 493 publications were ultimately included: 249 (50.5%) used adult surveillance data  
52 (GATS) and 248 (50.3%) used youth surveillance data (GYTS). Most publications were in  
53 English (97.2%,  $n=479$ ). Data published 50 or more times represented 12 low- and middle-  
54 income countries (LMIC): India, Bangladesh, Vietnam, Mexico, Egypt, Thailand, Poland,  
55 Philippines, China, Russian Federation, Turkey and Ukraine. While many of the papers analyzed  
56 data from low- and middle-income countries, the number of publications by origin of lead author  
57 was the highest for the United States ( $n=135$ ) and India ( $n=84$ ). Over 80% of the world's 1.3  
58 billion tobacco users live in low- and middle-income countries (LMIC) and we found  
59 underrepresentation of these countries as lead authors. These findings can be used to identify  
60 opportunities to enhance capacity for analysis, research and dissemination of global tobacco  
61 control data in LMIC.

62

## 63 **Introduction**

64 Enhancing research capacity, defined as the ability to engage in, perform or carry out quality  
65 research, has the potential to support policies and programs and hence prioritize public health  
66 issues (1, 2). Strengthening research capacity and dissemination for global tobacco control and  
67 scientific publications is critical to implement multisector policies and programs, especially in  
68 low- and middle-income countries (LMIC) where the majority of the burden lies(3-6). The  
69 incongruence between the high burden of diseases in LMIC, and low research productivity has  
70 been well documented (7-9). Authors from LMIC have disproportionately fewer publications  
71 than authors in HIC (10, 11) while, conversely, most of the burden of tobacco use falls on LMIC,  
72 which often have fewer financial resources and understaffed healthcare and academic  
73 workforce(1, 2). The decline in tobacco use for high income countries has been attributed in part  
74 to coordinated efforts guided by a strong research agenda, population-based surveillance, and  
75 communication of local research in scientific publications, all of which has driven  
76 implementation of programs and policies (3).

77 Tobacco kills more than eight million people each year worldwide, including 1.2 million people  
78 from secondhand smoke (12). Over 80% of people who smoke reside in LMIC, which are  
79 disproportionately affected by the burden of tobacco use and this in turn places a large burden on  
80 governments, health systems and individuals (13-15). In addition, there is a stark mismatch  
81 between the location where these peer-reviewed papers come from and the burden that affects  
82 LMIC, especially studies that focus on non-communicable diseases and its risk factors, including  
83 tobacco use (7, 16-18).

84

85 The World Health Organization Framework Convention on Tobacco Control (WHO FCTC) (19),  
86 was the first international treaty that provided key measures to implement and manage tobacco  
87 control. The FCTC has been critical since its inception in 2003, for signatory countries to have a  
88 research agenda to effectively monitor tobacco control regionally and locally. The Global  
89 Tobacco Surveillance System (GTSS) was established in 1998 to enhance the capacity of  
90 countries to design, implement and evaluate their national comprehensive tobacco action plan,  
91 and, for signatories, to monitor the key articles of the WHO FCTC (20). Two of GTSS' main  
92 components: The Global Youth Tobacco Survey (GYTS) started implementation on 1999 and  
93 the Global Adult Tobacco Survey (GATS) started in 2008. To date, GTSS has assisted over 180  
94 countries and locations to implement at least one survey of tobacco use and key tobacco control  
95 measures; many countries have completed multiple surveys and multiple rounds of the same  
96 survey (21, 22).

97 Twenty years after GTSS started, we still do not have an objective measurement of the scientific  
98 output for tobacco surveillance data. It is not yet clear how or whether the data collected through  
99 these surveys have been incorporated into research agendas leading to implementation of  
100 relevant programs and policies. There is no compendium or inventory of where these data were  
101 published, by whom these data have been published, and whether these data are published by  
102 lead authors coming from the country in which these data were collected. Such an inventory can  
103 be a step in the first determination of how or whether the data collected through these surveys  
104 have been incorporated into research agendas leading to implementation of relevant programs  
105 and policies. In this review, we present a bibliometric inventory of peer reviewed scientific  
106 publications that use two specific GTSS components: The GYTS and GATS. This inventory

107 will help determine whether, how and where published tobacco surveillance data has been used  
108 and will aim to identify research gaps and opportunities.

109 The objectives of this study were to 1) have a bibliometric inventory of peer-reviewed  
110 publications that used GTSS data, 2) to investigate the origin of the data versus the origin of lead  
111 authorship, 3) investigate geographic patterns of publications by country, region, and income,  
112 and 4) investigate patterns in use of GTSS data for publications.

## 113 **Methods**

### 114 **Search Strategy**

115 We searched six databases (Embase, MEDLINE including Epub ahead of print, Scopus, Scielo,  
116 BDSP and World Health Organization Regional Databases - Global Index Medicus) for relevant  
117 studies that included GTSS data between 1999 and January 2021. We restricted the search to  
118 publications in English, Spanish, French or Chinese. We included the following search terms:  
119 “tobacco AND Global Adult Tobacco Survey OR Global Youth Tobacco Survey OR GATS OR  
120 GYTS”

### 121 **Eligibility Criteria**

122 We included publications that: (1) used GATS and/or GYTS data in their methodology, (2) were  
123 a research article or abstract with the outcome being tobacco use (3) were in English, Spanish,  
124 French or Chinese.

125 We excluded 21 publications that mentioned in their methods they used an adapted or unofficial  
126 version of GATS or GYTS questionnaire in their methodology.

## 127 **Data Selection and Extraction**

128 We screened the records based on titles and abstracts retrieved from the search. For publications  
129 that were identified as potentially relevant, we retrieved and reviewed the full text. We also  
130 retrieved the full text if the abstract and title were not enough to decide eligibility. Two  
131 researchers extracted data from the potential publications. We used a predefined data extraction  
132 matrix to collect data from all eligible studies. The data extraction matrix was adapted from the  
133 Preferred Reporting Items for Systematic Reviews and Meta-Analysis (PRISMA) 2020 checklist  
134 (23). The information from non-English papers was extracted and entered into the database in  
135 English by two researchers that spoke the language. There were no French papers that met the  
136 eligibility criteria for extraction.

137 Data extracted included: year of publication, type of publication (manuscript or abstract),  
138 language of publication (English, Spanish, Chinese or French), dataset used (GATS or GYTS),  
139 origin of GTSS data by country (ies) and by WHO region and World Bank country income  
140 classification, years of GATS/GYTS conducted, lead author country of origin (defined by lead  
141 author's affiliation institution on the publication), international collaboration (defined by co-  
142 authors' affiliations), focus of the publication on one or more of the WHO MPOWER measures  
143 (24), type of tobacco analyzed in the article (smoked tobacco, smokeless tobacco, or e-  
144 cigarettes), age of study participants, sex of study participants, summary of methods, study  
145 outcome variable(s), main finding/summary of study's results, statistical program used for the  
146 analysis and use of other dataset(s) in addition to GATS or GYTS.

## 147 **Data Analysis**

148 To look at the characteristics for each GTSS publication, we tabulated the publications in each  
149 category using descriptive statistics, including frequencies and percentages. Publication trends  
150 were analyzed by year and type of data set used (GATS or GYTS).

151 After extracting data for lead author's origin and origin of GTSS data, we grouped countries  
152 based on the WHO regions: WHO Regional office for Africa (WHO/AFRO) (25), WHO  
153 Regional office for Europe (WHO/EURO) (26), WHO Regional Office for the Eastern  
154 Mediterranean (WHO/EMRO) (27), Regional office for the South-East Asia Region  
155 (WHO/SEARO) (28), Pan American Health Organization (WHO/PAHO) (29) and WHO regional  
156 Office for the Western Pacific Region (WHO/WPRO) (30), and by country income level  
157 according to the 2021 World Bank Income classification criteria which classifies countries as:  
158 high income countries (h-ICs), upper middle income countries (u-MICs), lower middle income  
159 countries (l-MICs); and low income countries (l-ICs) (31). For context, we qualitatively  
160 observed the relationship between the number of country specific research papers and the  
161 country's adult tobacco use burden by juxtaposing both indicators (adult tobacco use versus  
162 number of research papers per country).

163 We screened lead authorship data for publication outliers, which were defined as values greater  
164 than three standard deviations from the mean. Authorship in two countries – India and US – were  
165 outliers and were therefore analyzed independently from their respective region.

## 166 **Role of the funding source**

167 The funder of the research had no role in the design, selection, data collection, data analysis, data  
168 interpretation, or writing of the report of this scoping review.

169

## 170 **Results**

171 Our search strategy resulted in 1,834 records (532 from Medline, 655 from Embase, 586 from  
172 Scopus, 51 from Scielo and 10 from BDSP). After removing duplicates (n=976), we screened  
173 858 records and further excluded 306 due to the abstract and/or title not meeting the inclusion  
174 criteria (1. used GATS and/or GYTS data in their methodology, 2. were a research article or  
175 abstract with the outcome being tobacco use, 3. were in English, Spanish, French or Chinese).  
176 That left us with a total of 555 publications for final extraction. After reviewing the full text  
177 publication, we deemed 62 articles ineligible because they didn't meet the inclusion criteria. A  
178 final count of 493 publications met the inclusion criteria and were included in our review (Fig 1).

### 179 **Characteristics of GTSS Publications**

180 From the 493 publications reviewed, 251 (50.9%) used adult data (GATS) and 248 (50.3%) used  
181 youth data (GYTS) (Table 1). Six out of the 493 publications combined GATS and GYTS within  
182 the same publication. Fifty-two publications (10.5%) were abstracts for conferences and the rest  
183 were full manuscripts (80.5%, n=441). Most of the publications were in English (97.2%, n=479)  
184 and only a small number were in Spanish (2.2%, n=11) or Chinese (0.6%, n=3). We did not find  
185 any eligible publications in French. We looked at number of publications overtime since each of  
186 the surveys was implemented (GYTS started implementation in 1998 and GATS in 2008) and  
187 found no differences overtime.

188 **Table 1: Characteristics of GTSS-related publications by survey, 1999-2021**

189

| Characteristic                            | GTSS <sup>a</sup> survey |                            |                            |
|-------------------------------------------|--------------------------|----------------------------|----------------------------|
|                                           | Overall<br>n (%)         | GATS <sup>b</sup><br>n (%) | GYTS <sup>c</sup><br>n (%) |
| Total number of publications <sup>d</sup> | 493 (100)                | 251 (50.9)                 | 248 (50.3)                 |
| <b>Publication type<sup>d</sup></b>       |                          |                            |                            |
| Manuscript                                | 441 (89.5)               | 215 (85.7)                 | 232 (93.5)                 |



|                                                                            |            |            |            |
|----------------------------------------------------------------------------|------------|------------|------------|
| Abstract only <sup>e</sup>                                                 | 52 (10.5)  | 36 (14.3)  | 16 (6.5)   |
| <b>Publication language<sup>f</sup></b>                                    |            |            |            |
| English                                                                    | 479 (97.2) | 245 (97.6) | 240 (96.8) |
| Chinese                                                                    | 3 (0.6)    | 2 (0.8)    | 1 (0.4)    |
| Spanish                                                                    | 11 (2.2)   | 4 (1.6)    | 7 (2.8)    |
| <b>Origin of GTSS data by WHO Region<sup>g</sup></b>                       |            |            |            |
| AFRO                                                                       | 97 (12.0)  | 29 (6.9)   | 69 (17.2)  |
| EMRO                                                                       | 106 (13.1) | 46 (11.0)  | 62 (15.4)  |
| EURO                                                                       | 134 (16.6) | 66 (15.7)  | 71 (17.7)  |
| PAHO                                                                       | 120 (14.8) | 70 (16.7)  | 52 (12.9)  |
| SEARO                                                                      | 210 (26.0) | 136 (32.4) | 77 (19.2)  |
| WPRO                                                                       | 142 (17.6) | 73 (17.4)  | 71 (17.7)  |
| <b>Lead author by WHO region</b>                                           |            |            |            |
| AFRO                                                                       | 35 (7.1)   | 9 (3.6)    | 26 (10.5)  |
| EMRO                                                                       | 25 (5.1)   | 7 (2.8)    | 18 (7.3)   |
| EURO                                                                       | 76 (15.4)  | 32 (12.9)  | 45 (18.1)  |
| PAHO - total                                                               | 183 (37.1) | 88 (35.3)  | 96 (38.7)  |
| PAHO - (without US)                                                        | 48 (9.7)   | 24 (9.6)   | 24 (9.7)   |
| US alone                                                                   | 135 (27.4) | 64 (25.7)  | 72 (29.0)  |
| SEARO – total                                                              | 107 (21.7) | 81 (32.5)  | 27 (10.9)  |
| SEARO (without India)                                                      | 22 (4.5)   | 10 (4.0)   | 12 (4.8)   |
| India alone                                                                | 85 (17.2)  | 72 (28.9)  | 15 (6.0)   |
| WPRO                                                                       | 67 (13.6)  | 31 (12.4)  | 36 (14.5)  |
| <b>Lead author by world bank country income classification<sup>h</sup></b> |            |            |            |
| Low income                                                                 | 9 (1.8)    | 1 (0.4)    | 8 (3.2)    |
| Lower-middle income                                                        | 156 (31.6) | 106 (42.6) | 53 (21.4)  |
| Upper-middle income                                                        | 99 (20.2)  | 45 (18.1)  | 54 (21.9)  |
| High income                                                                | 229 (46.5) | 97 (39.0)  | 133 (53.6) |
| <b>Type of tobacco</b>                                                     |            |            |            |
| Smoked tobacco use <sup>i</sup>                                            | 466 (94.5) | 230 (92.4) | 240 (96.8) |
| Smokeless tobacco use <sup>j</sup>                                         | 151 (30.6) | 99 (39.8)  | 55 (22.2)  |
| E-cigarette                                                                | 20 (4.1)   | 9 (3.6)    | 12 (4.8)   |
| <b>Publications by sex</b>                                                 |            |            |            |
| Male only                                                                  | 4 (0.8)    | 3 (1.2)    | 1 (0.4)    |
| Female only                                                                | 10 (2.0)   | 9 (3.6)    | 2 (0.8)    |
| Both (male & female combined)                                              | 479 (97.2) | 237 (95.2) | 245 (98.8) |
| <b>Statistical software used for analysis</b>                              |            |            |            |
| Epi Info                                                                   | 8 (1.6)    | 3 (1.2)    | 6 (2.4)    |
| SAS                                                                        | 35 (7.1)   | 14 (5.6)   | 21 (8.5)   |
| SPSS                                                                       | 108 (21.9) | 64 (25.7)  | 44 (17.7)  |
| STATA                                                                      | 99 (20.1)  | 51 (20.5)  | 48 (19.4)  |
| SUDAAN                                                                     | 53 (10.8)  | 3 (1.2)    | 51 (20.6)  |
| STATISTICA                                                                 | 15 (3.0)   | 13 (5.2)   | 2 (0.8)    |
| R                                                                          | 6 (1.2)    | 2 (0.8)    | 4 (1.6)    |
| Other <sup>k</sup>                                                         | 21 (4.6)   | 11 (4.4)   | 10 (4.0)   |
| Not reported                                                               | 148 (30)   | 88 (35.3)  | 62 (25)    |

190 NOTE: “Origin of GTSS data by WHO region” and “Type of Tobacco” are not mutually exclusive; therefore, some columns do  
 191 not add up to the total number of publications reviewed.

192 <sup>a</sup> GTSS – Global Tobacco Surveillance System

193 <sup>b</sup> GATS – Global Adult Tobacco Survey

194 <sup>c</sup> GYTS – Global Youth Tobacco Survey

195 <sup>d</sup> Six articles used both GATS and GYTS are why the sum of the percentages of GATS and GYTS is more than 100%.  
196 <sup>e</sup> Abstract only – records found through our search that were only abstracts for conferences or special issues.  
197 <sup>f</sup> Publications were searched only in English, Chinese, French and Spanish. There where zero publications in French found thus  
198 we excluded it from the table.  
199 <sup>g</sup> Paper published with GTSS data from WHO regions: AFRO – WHO Regional office for Africa, EURO – WHO Regional office  
200 for Europe, EMRO - WHO Regional Office for the Eastern Mediterranean, SEARO – Regional office for the South-East Asia  
201 Region, PAHO – Pan American Health Organization and WPRO – WHO regional Office for the Western Pacific Region  
202 <sup>h</sup> World Bank country income classification  
203 <sup>i</sup> Smoked tobacco use included: Smoked tobacco products include cigarettes, cigars, bidis, and kreteks.  
204 <sup>j</sup> Smokeless tobacco products included: chewed, sniffed through the nose or held in mouth.  
205 <sup>k</sup> Other statistical software used for analysis included: Strata, MLwin, Durbin-Watson, Mplus, AS.  
206  
207  
208

209 Most publications reported data on smoked tobacco use 94.5% (n=466), while 30.6% (151)  
210 reported data on smokeless tobacco use, and 4.1% (n=20) reported data on e-cigarettes. Most  
211 publications (97.2%) presented data on both sexes (male and female study participants together),  
212 while a small percentage of publications focused their analysis only on females (2.0%, n=10) or  
213 males (0.8%, n=4). Publications used several statistical programs to analyze the data, the most  
214 used program was SPSS (21.9%, n=108)(Table 1)

215 Publications by WHO region were 19.7% (n=97) in the AFRO region, 21.5% (n=106) in the  
216 EMRO, 24.3% (n=120) in PAHO, 27.2% (n=134) in the EURO region, 28.8% (n=142) in the  
217 WPRO region, and 42.6% (n=210) in SEARO region. The highest number of publications for  
218 GATS surveillance data was in the SEARO region (n=136) and the lowest number in the AFRO  
219 region (n=29). For GYTS data, the number of publications was more evenly distributed across  
220 regions with the lowest percentage of publications being surveillance data from PAHO (n=52)  
221 and the highest being data from SEARO (n=77). (Table 1)

222 All countries that had conducted at least one round of GATS or GYTS had at least one  
223 publication (Fig 2). Twelve countries in the map (Bangladesh, China, Egypt, India, Mexico,  
224 Philippines, Poland, Russian Federation, Thailand, Turkey, Ukraine, and Vietnam) had GTSS

225 data published more than 50 times, while 56 countries had 1 to 5 publications (refer to  
226 Supplemental Table 1 to see a full list of publications using GTSS by country).

227 We found that overall, the percentage of publications that focused on *Monitor* (M) was the  
228 highest with 37.3% of publications, and the MPOWER topic with the least number of  
229 publications was *Raise* (R) 7.2%. In all WHO regions, M was the topic that was published about  
230 most while R was the topic published about least. This pattern was similar in all WHO regions  
231 (Fig 3).

### 232 **Lead author contribution to the GTSS literature**

233 Of the total number of publications that met the criteria, 37.1% (n=183) of publications were led  
234 by authors from the PAHO region, followed by authors from SEARO 27.1%(n=107), EURO  
235 15.4% (n=76), WPRO 13.6% (n=67) and AFRO 7.1% (n=35) and EMRO 5.1% (n=25). The  
236 PAHO and SEARO regions had the highest production of publications where the lead author's  
237 origin was the same as the country where the publication originated from. However, we  
238 performed an outlier analysis which showed PAHO without the United States and WHO South-  
239 East Asia without India. This analysis showed PAHO without the United States at 9.7% (n = 48)  
240 lead author publications and WHO South-East Asia without India at 4.5% (n = 22).. (Table 1)

241 After classifying lead author country by World Bank Income Classification (31), most GTSS  
242 publications (46.4%, n=228) were led by authors in h-ICs, while u-MICs produced 20% of the  
243 research (n=99), l-MCs produced 31.6% (n=155), and l-ICs accounted for 1.8% (n=9) of the  
244 research productivity (Table 1).

245 When looking at authorship by country, over 50% of the lead author research output was led by  
246 five countries: the United States (27.4%, n=135), followed by India (16.8%, n=83), Malaysia  
247 (4.5%, n=22), Vietnam (4.1%, n=20) and Poland (3.2%, n=16) (Fig 4). However, when

248 juxtaposing our findings of research capacity with tobacco use burden, capacity does not match  
249 the tobacco burden. Jordan, Greece and Bangladesh have one of the highest adult tobacco use  
250 reported, but have a total of four (0.8%), five (1.0%) and ten (2.0%) GTSS lead author  
251 publications, respectively. Lead authors in India and the U.S. had the highest number of  
252 publications compared to the rest of their whole WHO regions.

253

## 254 **Discussion**

255 This study is the first to look at GTSS publication output, origin of GTSS data as compared to  
256 origin of the lead author for the paper and patterns of publication by country, world region and  
257 income.

258 Countries with high burden of non-communicable diseases and risk factors (such as physical  
259 inactivity) tend to have lower research productivity.(2, 32) Our review identified unequal  
260 distribution of lead authorship and tobacco burden.. Over 80% of the world's 1.3 billion tobacco  
261 users live in low- and middle-income countries(12) and we found a lack of peer-reviewed  
262 publications using GTSS data that had lead authors from LMIC. This analysis could be driven by  
263 the high numbers of tobacco users in just China and India alone. These two countries alone  
264 account for more than half of the annual deaths that tobacco causes worldwide each year as they  
265 both are Middle Income Countries. Multi-country publications were also included in this  
266 analysis, some of which contain tobacco surveillance data from over 130 countries; although all  
267 countries who have conducted a GTSS survey were found in our review, most have not  
268 published their individual data (only multi-country peer-reviewed publications) that can help  
269 advance country-level tobacco control efforts.

270 Disparities in publication of GTSS data in peer-reviewed publications were noted between  
271 regions and countries. PAHO and WHO South-East Asia had the highest percentage of lead  
272 authorship, but this was predominantly driven by two countries: the United States in PAHO and  
273 India in WHO South-East Asia. The output of publications from lead authors in the U.S. and  
274 India combined surpassed the publication of lead authors by the rest of AFRO, EMRO, EURO,  
275 and WPRO regions put together. Following India and the U.S., the countries with highest lead  
276 authorship were Malaysia, Vietnam, Poland, Mexico, Bangladesh, The United Kingdom, and  
277 Zambia. These disparities in publication are not explained by availability of GTSS data.  
278 Although the U.S. has not implemented a GTSS survey, the U.S. had the highest number of lead  
279 author publications of GTSS data, this could be explained possibly by the funding being based in  
280 the U.S.

281 Another issue that could have explained these differences could be access to GTSS surveillance  
282 data, including issues such as internet connectivity to download large files. Theoretically, all  
283 researchers with access to the internet have access to all GTSS data through platforms such as  
284 <https://www.cdc.gov/tobacco/global/gtss/gtssdata/index.html>, [www.gtssacademy.org](http://www.gtssacademy.org), and  
285 <https://extranet.who.int/ncdsmicrodata/index.php/home>. However, internet connectivity might  
286 vary by country and explain some of the differences in access to GTSS data. Additionally,  
287 researchers have not evaluated global access, availability and awareness of the above websites  
288 and resources.

289 Countries that have a higher prevalence of tobacco use (above 30%) and have implemented  
290 GTSS, have low lead authorship. This is in line with previous studies showing the huge burden  
291 of some diseases and risk factors in LMIC (such as CVD and physical inactivity) and the  
292 disparity in publications (2, 32, 33). Overall, the AFRO region had the lowest number of

293 publications (n=97) but had a relative high number of youth (GYTS) publications (n=69), posing  
294 them as a model for other regions to learn about what AFRO is doing for research dissemination  
295 efforts among youth. This is very important given that the AFRO region is the fastest growing  
296 among the six WHO regions and has been estimated to have a rise in tobacco consumption to  
297 37% by 2025 (15).

298 Disparities in global health research have been previously described as the 10/90 divide, where  
299 less than 10% of the world's research resources are allocated to 90% of all preventable deaths  
300 worldwide (34). A recent analysis of authorship trends in *The Lancet Global Health* (10) found  
301 an under-representation of papers that came from authors in LMICs stating that 35% of the  
302 papers in their journal came from authors in LMIC, while 92% of the articles addressed issues in  
303 these same countries, which points to the underrepresentation of most LMICs in research  
304 literature. Another study from 2004 found similar disparities in contributing authors from LMICs  
305 in high five impact journals (11). In our analysis, l-ICs, as defined by the World Bank Income  
306 Classification, had 1.8% (9 publications overall) lead authorship, following u-MICs (20.2%,  
307 n=99), l-MICs (31.6%, n=155) and h-ICs (46.4%, n=228). L-MICs had a higher lead authorship  
308 than u-MICs, and this could be explained by India's high number of publications, because the  
309 country falls under the l-MIC World Bank Classification.

310 The underrepresentation of tobacco literature from lead authors in LMIC is not a new finding (7,  
311 17, 35), however, the reasons for these disparities could be due to several factors. High skill  
312 migration, or "brain drain", is a documented pattern globally (36); future work could assess if  
313 authors from the countries where the data originates have relocated their careers to the U.S.,  
314 India, or other highly publishing countries. Additionally, resources and workforce capacity to  
315 publish research is scarce in LMIC. There may be fewer graduate level training programs

316 available in some regions (i.e., Latin America) (37), resulting in limited numbers of trained local  
317 researchers and thereby fewer tobacco-related publications. Journals may be more accessible to  
318 authors within highly publishing countries such as the U.S. or India due to the location of  
319 institutions hosting journals within these countries. Language limitations should also be  
320 considered: many journals require submission of manuscripts in English; capable researchers  
321 who do not have familiarity with English may be unable to prepare or submit manuscripts in  
322 English, or submissions of native English speakers may be more likely to be accepted for  
323 publication in indexed journals. There are disparities in availability of mentorship toward peer-  
324 reviewed publication, disparities in capacity to analyze, summarize, and disseminate surveillance  
325 data, and disparities in resources available to hire either contracted or institutional analysts (38-  
326 40). In the context of competing public health priorities for Ministries of Health in low-resource,  
327 low-staff settings, researchers may not have the time or support to write papers for publication.  
328 Other competing organizational priorities, such as grant writing or donor reporting, may also  
329 decrease time available for manuscript preparation or submission, especially in LMICs where  
330 health workforce capacity is already identified as a challenge because of limited number of staff  
331 and other competing priorities (41). Lesser academic incentive for publication outside the U.S.  
332 and India, if present, may also contribute to publication disparities. If editorial boards of peer-  
333 reviewed journals are not of diverse national origin, the composition of persons selecting  
334 manuscripts for publication may also contribute to publication disparities (42-44). Fees for  
335 publication may contribute to disparities in publication (45), although this does not explain  
336 disparately low numbers of publications out of the United Kingdom or other HICs: although  
337 some journals waive their fee for publication for LMICs (46, 47), authors may not know this, and  
338 may therefore perceive a financial barrier to publication.

339 In addition to identifying disparities in numbers of lead author publications by country and  
340 region, we additionally observed unequal distribution of publication focus by MPOWER  
341 measure. When analyzing publications by MPOWER measure of focus, we found that most of  
342 the publications that used GTSS data focused on M (Monitor tobacco use and prevention  
343 policies) with some focusing also on P (protect people from secondhand smoke) W (warn about  
344 the dangers of tobacco smoke) E (Enforce bans on tobacco advertising, promotion and  
345 sponsorship) and O (Offer help to quit tobacco use). In our analysis we found few publications  
346 that focused on R (Raise taxes on tobacco). The 2021 WHO Global Tobacco Control Report  
347 states that “...while being the most effective way to reduce tobacco use, taxation is still the  
348 MPOWER policy with the lowest population coverage and has not increased from the 13%  
349 achieved in 2018.” (48) This highlights a potential opportunity to expand the focus of scientific  
350 publications of GTSS data.

351 In addition to identification of disparities in publications and unequal utilization of MPOWER  
352 measure of publication focus, we additionally observed a paucity of publications addressing new  
353 and emerging tobacco products. The 2021 Global Tobacco Control Report highlights the  
354 importance of this emerging public health threat and the lack of data and research worldwide for  
355 this changing tobacco product landscape (48). In our analysis, we found that only 4.1% (20  
356 publications) of all GTSS publications analyzed data on e-cigarettes, 3.6% (9 publications) for  
357 GATS and 4.8 (12 publications) for GYTS. This could be due in part to the e-cigarette questions  
358 on GTSS are optional, thus leaving it up to each country to ask about novel and emerging  
359 products and that e-cigarettes and emerging new products are relatively new. This may present a  
360 challenge to health equity if countries that are likely to see surges in new and emerging products  
361 are not equipped to collect the data or to publish their findings.



362 This study has some limitations. First, our search was limited to manuscripts in English, Spanish,  
363 French and Chinese and may be underreporting for publications in other languages. Second, our  
364 search strategy only addressed peer-reviewed databases in public health literature, so we did not  
365 include publications and reports in the grey literature or other types of peer-reviewed reports like  
366 economic publications. Third, the origin of lead authorship reflects the institution where the  
367 author was working at the time of publishing and not necessarily where the author is from and  
368 hence, we could not capture the actual country of origin of the lead author, (lead authors could be  
369 originally from LMICs but may be working or studying in a HICs institution). Fourth, we were  
370 only able to collect lead author country data leaving co-authors' country of origin out, and fifth,  
371 we did not focus on an explicit assessment of publication quality.

372 The Global Tobacco Surveillance System started more than 20 years ago and has been  
373 implemented in over 180 countries and locations (49). Since then, there have been several  
374 initiatives to strengthen capacity to use and disseminate GTSS and tobacco control data globally  
375 including the Data-to-Action Workshops (50) which aim to build capacity to use data to inform  
376 and disseminate tobacco prevention and control strategies, the Tobacco Control Scholars  
377 Program focusing on peer-to-peer mentoring to publish scientific manuscripts in tobacco  
378 control, and established academic training programs like the Field Epidemiology Training  
379 Program (51). Having local and current peer-reviewed research could help researchers, decision  
380 makers and local organizations prioritize strategies especially as the burden of disease falls in  
381 these countries. Some initiatives that have helped enhance capacity for tobacco control have  
382 done so by building researchers' and practitioners' ability to understand, use, and disseminate  
383 tobacco control data among researchers and practitioners. The findings in this bibliometric  
384 inventory can be used to identify surveillance needs, research gaps and opportunities for data

385 dissemination as well as prioritize building research capacity and mentoring initiatives to  
386 enhance the use of GTSS data in LMICs.

387

388

## 389 **Acknowledgements**

390 The authors would like to express our grateful thanks to Christine Shi from the CDC Foundation  
391 as she assisted with the translation and extraction of the three papers in Chinese. Partial financial  
392 support for this paper was provided by the CDC Foundation with a grant from Bloomberg  
393 Philanthropies.

394

395

396

397

398

399

400

401

402

403

404

405

406

407

408

409

410

411

412

## References

1. Bowsher G, Papamichail A, El Achi N, Ekzayez A, Roberts B, Sullivan R, et al. A narrative review of health research capacity strengthening in low and middle-income countries: lessons for conflict-affected areas. *Global Health*. 2019;15(1):23.
2. Ramírez Varela A, Cruz GIN, Hallal P, Blumenberg C, da Silva SG, Salvo D, et al. Global, regional, and national trends and patterns in physical activity research since 1950: a systematic review. *Int J Behav Nutr Phys Act*. 2021;18(1):5.
3. Lando HA, Borrelli B, Klein LC, Waverley LP, Stillman FA, Kassel JD, et al. The landscape in global tobacco control research: a guide to gaining a foothold. *Am J Public Health*. 2005;95(6):939-45.
4. Pérez-Escamilla R, Lutter CK, Rabadan-Diehl C, Rubinstein A, Calvillo A, Corvalán C, et al. Prevention of childhood obesity and food policies in Latin America: from research to practice. *Obes Rev*. 2017;18 Suppl 2:28-38.
5. Tugwell P, Sitthi-Amorn C, Hatcher-Roberts J, Neufeld V, Makara P, Munoz F, et al. Health Research Profile to assess the capacity of low and middle income countries for equity-oriented research. *BMC Public Health*. 2006;6:151.
6. Lansang MA, Dennis R. Building capacity in health research in the developing world. *Bull World Health Organ*. 2004;82(10):764-70.
7. Mamudu HM, Subedi P, Alamin AE, Veeranki SP, Owusu D, Poole A, et al. The Progress of Tobacco Control Research in Sub-Saharan Africa in the Past 50 Years: A Systematic Review of the Design and Methods of the Studies. *Int J Environ Res Public Health*. 2018;15(12).
8. Rochon PA, Mashari A, Cohen A, Misra A, Laxer D, Streiner DL, et al. Relation between randomized controlled trials published in leading general medical journals and the global burden of disease. *Cmaj*. 2004;170(11):1673-7.
9. Vetter N. Research publication in developing countries. *J Public Health Med*. 2003;25(3):189.
10. Iyer AR. Authorship trends in The Lancet Global Health. *Lancet Glob Health*. 2018;6(2):e142.
11. Sumathipala A, Siribaddana S, Patel V. Under-representation of developing countries in the research literature: ethical issues arising from a survey of five leading medical journals. *BMC Med Ethics*. 2004;5:E5.
12. Smoking prevalence and attributable disease burden in 195 countries and territories, 1990-2015: a systematic analysis from the Global Burden of Disease Study 2015. *Lancet*. 2017;389(10082):1885-906.
13. World Health Organization, WHO. Report on the Global Tobacco Epidemic, Offer help to quit tobacco use. Retrieved from <https://www.who.int/publications/i/item/9789241516204>. 2019.

14. Mathers CD, Loncar D. Projections of global mortality and burden of disease from 2002 to 2030. *PLoS Med.* 2006;3(11):e442.
15. Bilano V, Gilmour S, Moffiet T, d'Espaignet ET, Stevens GA, Commar A, et al. Global trends and projections for tobacco use, 1990-2025: an analysis of smoking indicators from the WHO Comprehensive Information Systems for Tobacco Control. *Lancet.* 2015;385(9972):966-76.
16. Ghani M, Hurrell R, Verceles AC, McCurdy MT, Papali A. Geographic, Subject, and Authorship Trends among LMIC-based Scientific Publications in High-impact Global Health and General Medicine Journals: A 30-Month Bibliometric Analysis. *J Epidemiol Glob Health.* 2021;11(1):92-7.
17. Allen LN, Fox N, Ambrose A. Quantifying research output on poverty and non-communicable disease behavioural risk factors in low-income and lower middle-income countries: a bibliometric analysis. *BMJ Open.* 2017;7(11):e014715.
18. Malekzadeh A, Michels K, Wolfman C, Anand N, Sturke R. Strengthening research capacity in LMICs to address the global NCD burden. *Glob Health Action.* 2020;13(1):1846904.
19. World Health Organization. WHO Framework Convention on Tobacco Control. Resolution WHA 56.1. In: 56th World Health Assembly, Geneva, 19-34 May 2003 Geneva. Available from: [http://apps.who.int/gb/archive/pdf\\_files/WHA56/ea56r1.pdf](http://apps.who.int/gb/archive/pdf_files/WHA56/ea56r1.pdf)
20. World Health Organization. Tobacco Surveillance [Available from: <https://www.who.int/teams/noncommunicable-diseases/surveillance/systems-tools/tobacco-surveillance>].
21. Centers for Disease Control and Prevention, CDC Foundation. Agenda for the GTSS 20th Anniversary Meeting, October 22 2019, Atlanta, Georgia. 2019.
22. Centers for Disease Control and Prevention. Global Tobacco Control - About GTSS 2018 [Available from: <https://www.cdc.gov/tobacco/global/gtss/index.htm>].
23. Page MJ, McKenzie JE, Bossuyt PM, Boutron I, Hoffmann TC, Mulrow CD, et al. The PRISMA 2020 statement: an updated guideline for reporting systematic reviews. *BMJ.* 2021;372.
24. World Health Organization. MPOWER Framework [Available from: <https://www.who.int/initiatives/mpower>].
25. World Health Organization. WHO Regional Office for Africa.
26. World Health Organization. WHO Regional Office for Europe.
27. World Health Organization. WHO Regional Office for the Eastern Mediterranean
28. World Health Organization. WHO Regional Office for South-East Asia.
29. World Health Organization. Panamerican Health Organization. WHO Regional Office for the Americas.
30. World Health Organization. WHO Western Pacific Region
31. The World Bank. World Bank Country and Lending Groups 2021 [Available from: <https://datahelpdesk.worldbank.org/knowledgebase/articles/906519-world-bank-country-and-lending-groups>].
32. Pratt M, Sarmiento OL, Montes F, Ogilvie D, Marcus BH, Perez LG, et al. The implications of megatrends in information and communication technology and transportation for changes in global physical activity. *Lancet.* 2012;380(9838):282-93.

33. Bloomfield GS, Baldrige A, Agarwal A, Huffman MD, Colantonio LD, Bahiru E, et al. Disparities in cardiovascular research output and citations from 52 African countries: a time-trend, bibliometric analysis (1999-2008). *J Am Heart Assoc.* 2015;4(4).
34. World Health Organization, Global Forum for Health Research. The 10/90 report on health research. 2000.
35. Zyoud SH. Estimates of global research productivity in using nicotine replacement therapy for tobacco cessation: a bibliometric study. *Global Health.* 2018;14(1):14.
36. Docquier F, Rapoport H. Globalization, Brain Drain, and Development. *Journal of Economic Literature.* 2012;50(3):681-730.
37. Salvo D, Reis RS, Sarmiento OL, Pratt M. Overcoming the challenges of conducting physical activity and built environment research in Latin America: IPEN Latin America. *Prev Med.* 2014;69 Suppl 1:S86-92.
38. Chi BH, Belizan JM, Blas MM, Chuang A, Wilson MD, Chibwesa CJ, et al. Evaluating Academic Mentorship Programs in Low- and Middle-Income Country Institutions: Proposed Framework and Metrics. *Am J Trop Med Hyg.* 2019;100(1\_Suppl):36-41.
39. Dick VR, Masters AE, McConnon PJ, Engel JP, Underwood VN, Harrison RJ. The CDC/Council of state and territorial epidemiologists applied epidemiology fellowship program: evaluation of the first 9 years. *Am J Prev Med.* 2014;47(5 Suppl 3):S376-82.
40. Lescano AG, Cohen CR, Raj T, Rispel L, Garcia PJ, Zunt JR, et al. Strengthening Mentoring in Low- and Middle-Income Countries to Advance Global Health Research: An Overview. *Am J Trop Med Hyg.* 2019;100(1\_Suppl):3-8.
41. Garcia de Quevedo I, Lobelo F, Cadena L, Soares M, Pratt M. A comprehensive capacity assessment tool for non-communicable diseases in low- to middle-income countries: development and results of pilot testing. *Glob Health Promot.* 2018;25(1):43-53.
42. Akhaddar A. Letter to the Editor: "Developing Countries Representation on Editorial Boards of Major Indexed Neurosurgical Journals Worldwide". *World Neurosurg.* 2021;149:304-6.
43. Xu B, Meng H, Qin S, Liu Y, Li Z, Cao J, et al. How international are the editorial boards of leading spine journals? A STROBE-compliant study. *Medicine (Baltimore).* 2019;98(5):e14304.
44. Saxena S, Levav I, Maulik P, Saraceno B. How international are the editorial boards of leading psychiatry journals? *Lancet.* 2003;361(9357):609.
45. Gardner UG, Jr., Thompson PS, Burton J, Stewart C, Fuller CD, Rooney MK, et al. Article Processing Charge Waiver Policies as a Barrier to Oncology Scholarship in Low- and Lower-Middle-Income Countries. *JCO Glob Oncol.* 2021;7:1413-7.
46. Springer Open. APC waivers and discounts [December 4, 2021]. Available from: <https://www.springeropen.com/get-published/article-processing-charges/open-access-waiver-fund>.
47. Wiley. Waivers and Discounts [December 4, 2021]. Available from: <https://authorservices.wiley.com/open-research/open-access/for-authors/waivers-and-discounts.html>.
48. World Health Organization, WHO. Report on the Global Tobacco Epidemic: Addressing New and Emerging Products. 2021.
49. Global Tobacco Surveillance System (GTSS): purpose, production, and potential. *J Sch Health.* 2005;75(1):15-24.

50. Garcia de Quevedo I, Tripp A, Twentyman E, Smith R, Ahluwalia IB. Evaluation of Five Data-to-Action Workshops to Enhance Capacity for Tobacco Control. *Health Promot Pract.* 2021.
51. Subramanian RE, Herrera DG, Kelly PM. An evaluation of the global network of field epidemiology and laboratory training programmes: a resource for improving public health capacity and increasing the number of public health professionals worldwide. *Hum Resour Health.* 2013;11:45.

medRxiv preprint doi: <https://doi.org/10.1101/2022.08.08.22273271>; this version posted September 9, 2022. The copyright holder for this preprint (which was not certified by peer review) is the author/funder, who has granted medRxiv a license to display the preprint in perpetuity. It is not subject to copyright under 17 USC 105 and is also made available for use under a CC0 license.

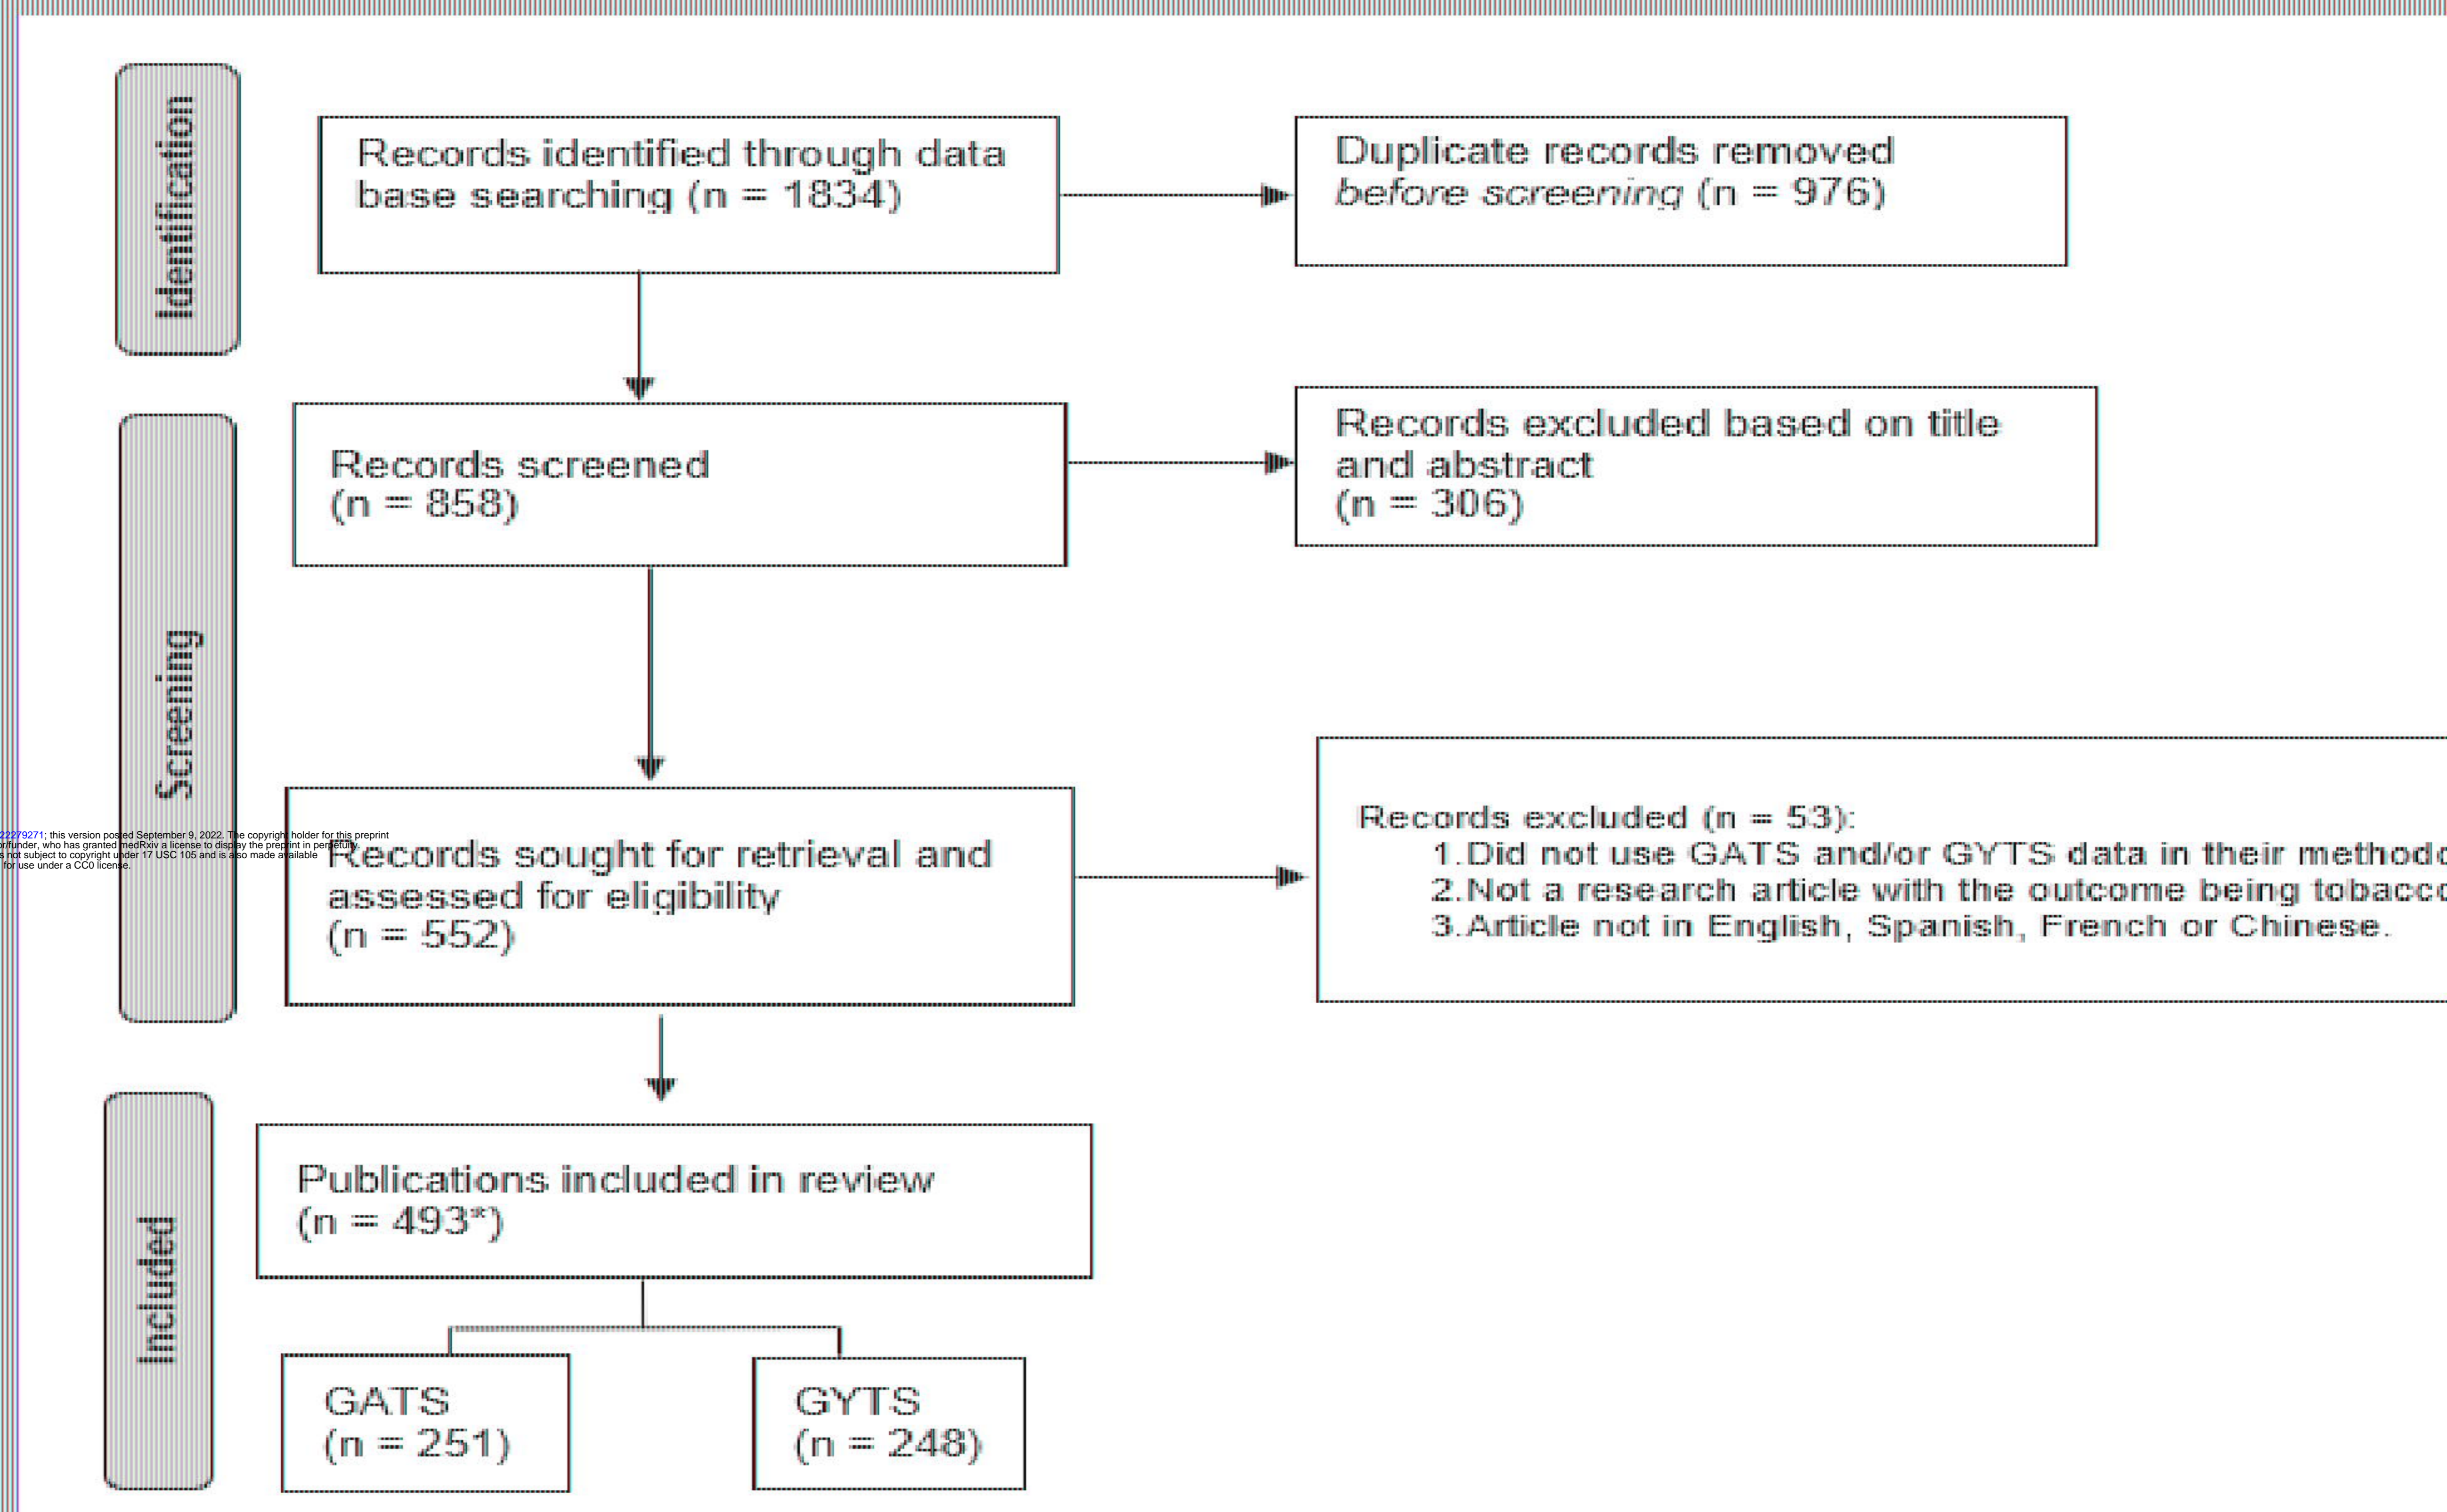

Source: https://medrxiv.org/content/10.1101/2022.09.08.22279271v1.full.pdf
